# Supplementary material for: Diversity and Pathogenicity of Fusarium Species Associated with Stalk and Crown Rot in Maize in Northern Italy
Source: MDPI journal article supplement (doi:10.3390/plants12223857), 2023-11-15
Supplement: s1 [file s1]

Table S1. Origin, host, culture and sequence GenBank accession number of *Fusarium* isolates used and generated in this study. Newly generated accession numbers are in bold.

| Species                 | Complex | Collection        | Host                                                      | Origin          | <i>tef1-<math>\alpha</math></i> | <i>rpb2</i>     | <i>calm</i>     | <i>tub2</i>     | Reference                |
|-------------------------|---------|-------------------|-----------------------------------------------------------|-----------------|---------------------------------|-----------------|-----------------|-----------------|--------------------------|
| <i>F. acutatum</i>      | FFSC    | CBS 401.97        | <i>Cajanus cajan</i>                                      | India           | MW402124                        | MW402813        | MW402458        | MW402322        | Yilmaz et al. (2021)     |
| <i>F. agapanthi</i>     | FFSC    | CBS 100193        | <i>Agapanthus praecox</i>                                 | New Zealand     | MW401959                        | MW402727        | MW402363        | MW402160        | Yilmaz et al. (2021)     |
| <i>F. aglaonematis</i>  | FFSC    | ZHKUCC<br>22-0079 | <i>Aglaonema modestum</i>                                 | China           | ON330439                        | ON330445        | ON330436        | ON330442        | Zhang et al. (2022)      |
| <i>F. ananatum</i>      | FFSC    | CBS 118516        | <i>Ananas comosus</i>                                     | South Africa    | LT996091                        | LT996137        | MW402376        | MN534089        | Yilmaz et al. (2021)     |
| <i>F. andiyazi</i>      | FFSC    | CBS 119856        | Sorghum grain                                             | Ethiopia        | MN533989                        | MN534286        | MN534174        | MN534081        | Yilmaz et al. (2021)     |
| <i>F. annulatum</i>     | FFSC    | CBS 115.97        | <i>Dianthus caryophyllus</i>                              | Italy           | MW401973                        | MW402785        | MW402373        | MW402173        | Yilmaz et al. (2021)     |
| <i>F. annulatum</i>     | FFSC    | CBS 133.95        | <i>Dianthus caryophyllus</i>                              | The Netherlands | MW402040                        | MW402743        | MW402407        | MW402239        | Yilmaz et al. (2021)     |
| <i>F. annulatum</i>     | FFSC    | CBS 135.95        | <i>Dianthus caryophyllus</i>                              | The Netherlands | MW402043                        | MW402745        | MW402408        | MW402242        | Yilmaz et al. (2021)     |
| <i>F. annulatum</i>     | FFSC    | 2.1               | <i>Zea mays</i>                                           | Italy           | <b>OR565982</b>                 | <b>OR566043</b> | <b>OR566020</b> | <b>OR566004</b> | This study               |
| <i>F. annulatum</i>     | FFSC    | 2.2               | <i>Zea mays</i>                                           | Italy           | <b>OR565983</b>                 | <b>OR566044</b> | <b>OR566021</b> | <b>OR566005</b> | This study               |
| <i>F. annulatum</i>     | FFSC    | 9                 | <i>Zea mays</i>                                           | Italy           | <b>OR565984</b>                 | <b>OR566045</b> | <b>OR566022</b> | <b>OR566006</b> | This study               |
| <i>F. annulatum</i>     | FFSC    | 10.1              | <i>Zea mays</i>                                           | Italy           | <b>OR565985</b>                 | <b>OR566046</b> | <b>OR566023</b> | <b>OR566007</b> | This study               |
| <i>F. annulatum</i>     | FFSC    | 10.2              | <i>Zea mays</i>                                           | Italy           | <b>OR565986</b>                 | <b>OR566047</b> | <b>OR566024</b> | <b>OR566008</b> | This study               |
| <i>F. annulatum</i>     | FFSC    | 55                | <i>Zea mays</i>                                           | Italy           | <b>OR565987</b>                 | <b>OR566048</b> | <b>OR566025</b> | <b>OR566009</b> | This study               |
| <i>F. anthophilum</i>   | FFSC    | CBS 108.92        | <i>Hippeastrum</i> leaf                                   | The Netherlands | MW401965                        | MW402783        | MW402368        | MW402166        | Yilmaz et al. (2021)     |
| <i>F. aquaticum</i>     | FFSC    | LC7502            | Water                                                     | China           | MW580448                        | MW474394        | MW566275        | MW533730        | Wang (2022)              |
| <i>F. awaxy</i>         | FFSC    | CBS 119831        | Environmental                                             | New Guinea      | MN534056                        | MN534237        | MN534167        | MN534108        | Yilmaz et al. (2021)     |
| <i>F. babinda</i>       | FFSC    | NRRL 25539        | Unknown                                                   | Unknown         | KU171718                        | KU171698        | KU171418        | KU171778        | O' Donnell et al. (2013) |
| <i>F. bactridioides</i> | FFSC    | CBS 100057        | <i>Cronartium conigenum</i><br>on <i>Pinus leiophylla</i> | USA             | MN533993                        | MN534235        | MN534173        | MN534112        | Yilmaz et al. (2021)     |
| <i>F. begoniae</i>      | FFSC    | CBS 452.97        | <i>Begonia elatior</i> hybrid                             | Germany         | MN533994                        | MN534243        | MN534163        | MN534101        | Yilmaz et al. (2021)     |

| Species                    | Complex | Collection | Host                           | Origin          | <i>tef1-α</i>   | <i>rpb2</i>     | <i>calm</i>     | <i>tub2</i>     | Reference                              |
|----------------------------|---------|------------|--------------------------------|-----------------|-----------------|-----------------|-----------------|-----------------|----------------------------------------|
| <i>F. braichiariae</i>     | FFSC    | CML 3163   | <i>Brachiaria decumbens</i>    | Brazil          | MT901349        | MT901315        | -               | MT901322        | Moreira Costa et al. (2021)            |
| <i>F. brevicatenulatum</i> | FFSC    | CBS 404.97 | <i>Striga asiatica</i>         | Madagascar      | MN533995        | MN534295        | MT010979        | MN534063        | Yilmaz et al. (2021)                   |
| <i>F. bulbicola</i>        | FFSC    | NRRL13618  | <i>Nerine bowdenii</i> bulb    | The Netherlands | KF466415        | MW402767        | MW402450        | KF466437        | Yilmaz et al. (2021)                   |
| <i>F. caapi</i>            | FFSC    | LLC3556    | <i>Sorghum</i>                 | Ethiopia        | OP486950        | OP486519        | OP485837        | -               | Lombard et al. (2022)                  |
| <i>F. callistephi</i>      | FOSC    | CBS 187.53 | <i>Callistephus chinensis</i>  | The Netherlands | MH484966        | MH484875        | MH484693        | MH485057        | Lombard et al. (2019)                  |
| <i>F. carminascens</i>     | FOSC    | CPC 25792  | <i>Zea mays</i>                | South Africa    | MH485025        | MH484934        | MH484752        | MH485116        | Lombard et al. (2019)                  |
| <i>F. casha</i>            | FFSC    | PPRI20462  | <i>Amaranthus cruentus</i>     | South Africa    | MF787262        | -               | -               | MF787256        | Vermeulen et al. (2021)                |
| <i>F. chinhoiense</i>      | FFSC    | NRRL 25221 | <i>Zea mays</i>                | Zimbabwe        | MN534050        | MN534262        | MN534196        | MN534082        | Yilmaz et al. (2021)                   |
| <i>F. chuoi</i>            | FFSC    | CPC 39664  | Unknown                        | Unknown         | OK626308        | OK626302        | OK626304        | OK626310        | Yilmaz et al. (2021)                   |
| <i>F. circinatum</i>       | FFSC    | CBS 405.97 | <i>Pinus radiata</i>           | USA             | MN533997        | MN534252        | MN534199        | MN534097        | Yilmaz et al. (2021)                   |
| <i>F. coicis</i>           | FFSC    | RBG5368    | <i>Coix gasteenii</i>          | Australia       | KP083251        | KP083274        | LT996178        | LT996115        | Laurence et al. (2015)                 |
| <i>F. commune</i>          | FNSC    | NRRL 28387 | <i>Dianthus caryophyllus</i>   | The Netherlands | HM057338        | JX171638        | KU171420        | AY329043        | Han et al. (2023)                      |
| <i>F. commune</i>          | FNSC    | LC18507    | <i>Zea mays</i>                | China           | OQ125095        | OQ125101        | -               | -               | Han et al. (2023)                      |
| <i>F. commune</i>          | FNSC    | LC18486    | <i>Zea mays</i>                | China           | OQ125094        | OQ125100        | -               | -               | Han et al. (2023)                      |
| <i>F. commune</i>          | FNSC    | LC18652    | <i>Zea mays</i>                | China           | OQ125093        | OQ125099        | -               | -               | Han et al. (2023)                      |
| <i>F. commune</i>          | FNSC    | LC18609    | <i>Zea mays</i>                | China           | OQ125092        | OQ125098        | -               | -               | Han et al. (2023)                      |
| <i>F. commune</i>          | FNSC    | LC18583    | <i>Zea mays</i>                | China           | OQ125097        | OQ125103        | -               | -               | Han et al. (2023)                      |
| <i>F. commune</i>          | FNSC    | LC18568    | <i>Zea mays</i>                | China           | OQ125096        | OQ125102        | -               | -               | Han et al. (2023)                      |
| <i>F. commune</i>          | FNSC    | DB19LUG07  | <i>Zea mays</i>                | Italy           | <b>MW419921</b> | <b>MW419923</b> | <b>OR566042</b> | <b>OR566011</b> | Mezzalama et al. (2021),<br>This study |
| <i>F. commune</i>          | FNSC    | 24         | <i>Zea mays</i>                | Italy           | <b>OR565988</b> | <b>OR566049</b> | <b>OR566026</b> | <b>OR566010</b> | This study                             |
| <i>F. concentricum</i>     | FFSC    | CBS 450.97 | <i>Musa sapientum</i>          | Costa Rica      | AF160282        | JF741086        | MW402467        | MW402334        | Yilmaz et al. (2021)                   |
| <i>F. contaminatum</i>     | FOSC    | CBS 111552 | <i>Pasteurized fruit juice</i> | The Netherlands | MH484991        | MH484900        | MH484718        | MH485082        | Lombard et al. (2019)                  |

| Species                | Complex | Collection | Host                        | Origin          | <i>tef1-α</i>   | <i>rpb2</i>     | <i>calm</i>     | <i>tub2</i> | Reference               |
|------------------------|---------|------------|-----------------------------|-----------------|-----------------|-----------------|-----------------|-------------|-------------------------|
| <i>F. cugenangense</i> | FOSC    | CBS 620.72 | <i>Crocus</i> sp.           | Germany         | MH484970        | MH484879        | MH484697        | MH485061    | Lombard et al. (2019)   |
| <i>F. cugenangense</i> | FOSC    | CBS 130308 | <i>Human toe nail</i>       | New Zealand     | MH485011        | MH484920        | MH484738        | MH485102    | Lombard et al. (2019)   |
| <i>F. cugenangense</i> | FOSC    | CBS 131393 | <i>Vicia faba</i>           | Australia       | MH485019        | MH484928        | MH484746        | MH485110    | Lombard et al. (2019)   |
| <i>F. cugenangense</i> | FOSC    | CBS 130304 | <i>Gossypium barbadense</i> | China           | MH485012        | MH484921        | MH484739        | MH485103    | Lombard et al. (2019)   |
| <i>F. cugenangense</i> | FOSC    | 36         | <i>Zea mays</i>             | Italy           | <b>OR565989</b> | <b>OR566050</b> | <b>OR566027</b> | -           | This study              |
| <i>F. curculicola</i>  | FFSC    | PPRI20464  | <i>Amaranthus cruentus</i>  | South Africa    | MF787267        | MN605063        | -               | MF787259    | Vermeulen et al. (2021) |
| <i>F. curvatum</i>     | FOSC    | CBS 247.61 | <i>Matthiola incana</i>     | Germany         | MH484967        | MH484876        | MH484694        | MH485058    | Lombard et al. (2019)   |
| <i>F. curvatum</i>     | FOSC    | CBS 238.94 | <i>Beaucarnia</i> sp.       | The Netherlands | MH484984        | MH484893        | MH484711        | MH485075    | Lombard et al. (2019)   |
| <i>F. curvatum</i>     | FOSC    | CBS 141.95 | <i>Hedera helix</i>         | The Netherlands | MH484985        | MH484894        | MH484712        | MH485076    | Lombard et al. (2019)   |
| <i>F. denticulatum</i> | FFSC    | CBS 406.97 | <i>Ipomoea batatas</i>      | Cuba            | MN533999        | MN534273        | MN534185        | MN534067    | Yilmaz et al. (2021)    |
| <i>F. dhileepanii</i>  | FFSC    | BRIP 71717 | Unknown                     | Unknown         | OK509072        | OK533536        | -               | -           | Yilmaz et al. (2021)    |
| <i>F. dlaminii</i>     | FFSC    | CBS 481.94 | Unknown                     | Unknown         | MN534003        | MN534257        | MN534151        | MN534139    | Yilmaz et al. (2021)    |
| <i>F. dlaminii</i>     | FFSC    | CBS 671.94 | Soil                        | South Africa    | MN534004        | MN534254        | MN534152        | MN534136    | Yilmaz et al. (2021)    |
| <i>F. duoseptatum</i>  | FOSC    | CBS 102026 | <i>Musa sapientum</i>       | Malaysia        | MH484987        | MH484896        | MH484714        | MH485078    | Lombard et al. (2019)   |
| <i>F. echinatum</i>    | FFSC    | CBS 146497 | Unidentified tree           | South Africa    | MW834273        | MW834004        | MW834110        | MW834301    | Crous et al. (2021)     |
| <i>F. elaeagni</i>     | FFSC    | LC13629    | <i>Elaeagnus pungens</i>    | China           | MW580468        | MW474414        | MW566295        | MW533750    | Wang (2022)             |
| <i>F. elaeidis</i>     | FOSC    | CBS 217.49 | <i>Elaeis</i> sp.           | Zaire           | MH484961        | MH484870        | MH484688        | MH485052    | Lombard et al. (2019)   |
| <i>F. elaeidis</i>     | FOSC    | CBS 255.52 | <i>Elaeis guineensis</i>    | Unknown         | MH484965        | MH484874        | MH484692        | MH485056    | Lombard et al. (2019)   |
| <i>F. elaeidis</i>     | FOSC    | CBS 218.49 | <i>Elaeis</i> sp.           | Zaire           | MH484962        | MH484871        | MH484689        | MH485053    | Lombard et al. (2019)   |
| <i>F. fabacearum</i>   | FOSC    | CPC 25801  | <i>Zea mays</i>             | South Africa    | MH485029        | MH484938        | MH484756        | MH485120    | Lombard et al. (2019)   |
| <i>F. fabacearum</i>   | FOSC    | CPC 25802  | <i>Glycine max</i>          | South Africa    | MH485030        | MH484939        | MH484757        | MH485121    | Lombard et al. (2019)   |
| <i>F. fabacearum</i>   | FOSC    | CPC 25803  | <i>Glycine max</i>          | South Africa    | MH485031        | MH484940        | MH484758        | MH485122    | Lombard et al. (2019)   |

| Species                | Complex | Collection | Host                        | Origin       | <i>tef1-<math>\alpha</math></i> | <i>rpb2</i> | <i>calm</i> | <i>tub2</i> | Reference                    |
|------------------------|---------|------------|-----------------------------|--------------|---------------------------------|-------------|-------------|-------------|------------------------------|
| <i>F. ficicrescens</i> | FFSC    | CBS 125177 | Environmental               | Iran         | MN534006                        | MN534281    | MN534176    | MN534071    | Yilmaz et al. (2021)         |
| <i>F. foetens</i>      | FOSC    | CBS 120665 | <i>Nicotiana tabacum</i>    | Iran         | MH485009                        | MH484918    | MH484736    | MH485100    | Lombard et al. (2019)        |
| <i>F. fracticaudum</i> | FFSC    | CMW:25240  | <i>Pinus maximinoi</i>      | Colombia     | MN534009                        | MN534231    | MN534161    | MN534103    | Yilmaz et al. (2021)         |
| <i>F. fractiflexum</i> | FFSC    | NRRL 28852 | <i>Cymbidium</i> sp.        | Japan        | AF160288                        | LT575064    | AF158341    | AF160315    | Yilmaz et al. (2021)         |
| <i>F. fredkrugeri</i>  | FFSC    | CBS 408.97 | Soil                        | Maryland     | MW402126                        | MW402814    | MW402461    | MW402324    | Yilmaz et al. (2021)         |
| <i>F. fujikuroi</i>    | FFSC    | CBS 186.56 | Unknown                     | Unknown      | MW402108                        | EF470116    | MW402447    | MW402306    | Yilmaz et al. (2021)         |
| <i>F. gaditjirri</i>   | FNSC    | NRRL 45417 | <i>Hetepogon triticeus</i>  | Australia    | MN193881                        | MN193909    | KU171424    | KU171784    | Sandoval-Denis et al. (2018) |
| <i>F. globosum</i>     | FFSC    | CBS 430.97 | <i>Zea mays</i> seed        | South Africa | MN534013                        | MN534265    | MN534219    | MN534125    | Yilmaz et al. (2021)         |
| <i>F. glycines</i>     | FOSC    | CBS 176.33 | <i>Linum usitatissium</i>   | Unknown      | MH484959                        | MH484868    | MH484686    | MH485050    | Lombard et al. (2019)        |
| <i>F. gossypinum</i>   | FOSC    | CBS 116611 | <i>Gossypium hirsutum</i>   | Ivory Coast  | MH484998                        | MH484907    | MH484725    | MH485089    | Lombard et al. (2019)        |
| <i>F. gossypinum</i>   | FOSC    | CBS 116613 | <i>Gossypium hirsutum</i>   | Ivory Coast  | MH485000                        | MH484909    | MH484727    | MH485091    | Lombard et al. (2019)        |
| <i>F. gossypinum</i>   | FOSC    | CBS 116612 | <i>Gossypium hirsutum</i>   | Ivory Coast  | MH484999                        | MH484908    | MH484726    | MH485090    | Lombard et al. (2019)        |
| <i>F. guttiforme</i>   | FFSC    | CBS 409.97 | <i>Ananas comosus</i>       | Brazil       | MT010999                        | MT010967    | MT010901    | MT011048    | Yilmaz et al. (2021)         |
| <i>F. hechiense</i>    | FFSC    | LC13646    | <i>Musa nana</i>            | China        | MW580496                        | MW474442    | MW566323    | MW533775    | Wang (2022)                  |
| <i>F. hoodiae</i>      | FOSC    | CBS 132474 | <i>Hoodia gordonii</i>      | South Africa | MH485020                        | MH484929    | MH484747    | MH485111    | Lombard et al. (2019)        |
| <i>F. inflexum</i>     | FOSC    | NRRL 20433 | <i>Vicia faba</i>           | Germany      | AF008479                        | JX171583    | AF158366    | –           | O'Donnell et al. (2013)      |
| <i>F. konzum</i>       | FFSC    | CBS 139382 | Unknown                     | Unknown      | MW402071                        | MW402804    | MW402418    | MW402270    | Yilmaz et al. (2021)         |
| <i>F. lactis</i>       | FFSC    | CBS 420.97 | <i>Ficus carica</i>         | USA          | MN534015                        | -           | MN534181    | MN534078    | Yilmaz et al. (2021)         |
| <i>F. languescens</i>  | FOSC    | CBS 645.78 | <i>Solanum lycopersicum</i> | Morocco      | MH484971                        | MH484880    | MH484698    | MH485062    | Lombard et al. (2019)        |
| <i>F. libertatis</i>   | FOSC    | CPC 25782  | <i>Asphalatus</i> sp.       | South Africa | MH485023                        | MH484932    | MH484750    | MH485114    | Lombard et al. (2019)        |
| <i>F. lumajangense</i> | FFSC    | LC13652    | <i>Arenga caudata</i>       | China        | MW580503                        | MW474449    | MW566330    | MW533782    | Wang (2022)                  |

| Species                 | Complex | Collection    | Host                         | Origin          | <i>tef1-α</i>   | <i>rpb2</i>     | <i>calm</i>     | <i>tub2</i> | Reference                    |
|-------------------------|---------|---------------|------------------------------|-----------------|-----------------|-----------------|-----------------|-------------|------------------------------|
| <i>F. lyarnte</i>       | FNSC    | NRRL 54252    | <i>Sorghum interjectum</i>   | Australia       | MN193880        | MN193908        | -               | -           | Sandoval-Denis et al. (2018) |
| <i>F. madaense</i>      | FFSC    | CBS 146648    | <i>Arachis hypogaea</i>      | Nigeria         | MW402095        | MW402761        | MW402436        | MW402294    | Yilmaz et al. (2021)         |
| <i>F. mangiferae</i>    | FFSC    | CBS 119853    | <i>Mangifera</i> sp.         | South Africa    | MN534016        | MN534270        | MN534225        | MN534140    | Yilmaz et al. (2021)         |
| <i>F. marasasianum</i>  | FFSC    | CMW:25512     | <i>Pinus tecunumanii</i>     | Colombia        | MN534018        | MN534249        | MN534208        | MN534113    | Yilmaz et al. (2021)         |
| <i>F. mexicanum</i>     | FFSC    | NRRL 47473    | <i>Mangifera indica</i>      | Mexico          | GU737416        | LR792615        | GU737389        | GU737308    | Yilmaz et al. (2021)         |
| <i>F. mirum</i>         | FFSC    | LLC929        | <i>Sorghum</i>               | Ethiopia        | OP487012        | OP486581        | OP485896        | -           | Lombard et al. (2022)        |
| <i>F. miscanthi</i>     | FNSC    | NRRL 26231    | <i>Miscanthus sinensis</i>   | Japan           | KU171725        | KU171705        | KU171425        | KU171785    | Han et al. (2023)            |
| <i>F. mundagurra</i>    | FFSC    | RBG5717       | Soil                         | Australia       | KP083256        | KP083276        | MN534214        | MN534146    | Yilmaz et al. (2021)         |
| <i>F. napiforme</i>     | FFSC    | NRRL25196     | <i>Pennisetum typhoides</i>  | South Africa    | MN193863        | MN534291        | MN534192        | MN534085    | Laraba et al. (2020)         |
| <i>F. nirenbergiae</i>  | FOSC    | CBS 129.24    | <i>Secale cereale</i>        | Unknown         | MH484955        | MH484864        | MH484682        | MH485046    | Lombard et al. (2019)        |
| <i>F. nirenbergiae</i>  | FOSC    | CBS 127.81    | <i>Chrysantemum</i> sp.      | USA             | MH484974        | MH484883        | MH484701        | MH485065    | Lombard et al. (2019)        |
| <i>F. nirenbergiae</i>  | FOSC    | CBS 840.88    | <i>Dianthus caryophyllus</i> | The Netherlands | MH484978        | MH484887        | MH484705        | MH485069    | Lombard et al. (2019)        |
| <i>F. nirenbergiae</i>  | FOSC    | CBS 744.79    | <i>Passiflora edulis</i>     | Brazil          | MH484973        | MH484882        | MH484700        | MH485064    | Lombard et al. (2019)        |
| <i>F. nirenbergiae</i>  | FOSC    | 1RI (Pta 1.2) | <i>Zea mays</i>              | Italy           | <b>OR565990</b> | <b>OR566051</b> | <b>OR566028</b> | -           | This study                   |
| <i>F. nisikadoi</i>     | FNSC    | NRRL 25179    | <i>Phyllostachys nigra</i>   | Japan           | MN193879        | MN193907        | -               | -           | Sandoval-Denis et al. (2018) |
| <i>F. nygamai</i>       | FFSC    | CBS 413.97    | <i>Oryza sativa</i>          | Morocco         | MW402127        | MW402815        | MW402462        | MW402325    | Yilmaz et al. (2021)         |
| <i>F. odoratissimum</i> | FOSC    | CBS 794.70    | <i>Albizzia julibrissin</i>  | Iran            | MH484969        | MH484878        | MH484696        | MH485060    | Lombard et al. (2019)        |
| <i>F. ophioides</i>     | FFSC    | CBS 118510    | <i>Panicum maximum</i>       | South Africa    | MN534020        | MN534301        | MN534201        | MN534121    | Yilmaz et al. (2021)         |
| <i>F. oxysporum</i>     | FOSC    | CBS 144134    | <i>Solanum tuberosum</i>     | Germany         | MH485044        | MH484953        | MH484771        | MH485135    | Lombard et al. (2019)        |
| <i>F. oxysporum</i>     | FOSC    | CBS 144135    | <i>Solanum tuberosum</i>     | Germany         | MH485045        | MH484954        | MH484772        | MH485136    | Lombard et al. (2019)        |
| <i>F. oxysporum</i>     | FOSC    | CBS 221.49    | <i>Camellia sinensis</i>     | South East Asia | MH484963        | MH484872        | MH484690        | MH485054    | Lombard et al. (2019)        |

| Species                        | Complex | Collection | Host                          | Origin           | <i>tef1-α</i> | <i>rpb2</i> | <i>calm</i> | <i>tub2</i> | Reference                |
|--------------------------------|---------|------------|-------------------------------|------------------|---------------|-------------|-------------|-------------|--------------------------|
| <i>F. oxysporum</i>            | FOSC    | CPC 25822  | <i>Protea</i> sp.             | South Africa     | MH485034      | MH484943    | MH484761    | MH485125    | Lombard et al. (2019)    |
| <i>F. oxysporum sensu lato</i> | FOSC    | 11         | <i>Zea mays</i>               | Italy            | OR565991      | OR566052    | OR566029    | -           | This study               |
| <i>F. oxysporum sensu lato</i> | FOSC    | 12         | <i>Zea mays</i>               | Italy            | OR565992      | OR566053    | OR566030    | -           | This study               |
| <i>F. oxysporum sensu lato</i> | FOSC    | 18         | <i>Zea mays</i>               | Italy            | OR565993      | OR566054    | OR566031    | -           | This study               |
| <i>F. oxysporum sensu lato</i> | FOSC    | 26         | <i>Zea mays</i>               | Italy            | OR565994      | OR566055    | OR566032    | -           | This study               |
| <i>F. oxysporum sensu lato</i> | FOSC    | 51         | <i>Zea mays</i>               | Italy            | OR565995      | OR566056    | OR566033    | -           | This study               |
| <i>F. panlongense</i>          | FFSC    | LC13656    | <i>Musa nana</i>              | China            | MW580510      | MW474456    | MW566337    | MW533789    | Wang (2022)              |
| <i>F. paranisikadoi</i>        | FNSC    | LC2824     | <i>Zea mays</i>               | China            | MW594317      | MW474550    | -           | MW533921    | Han et al. (2023)        |
| <i>F. parvoisorum</i>          | FFSC    | CMW:25267  | <i>Pinus patula</i>           | Colombia         | KJ541060      | -           | -           | KJ541055    | Yilmaz et al. (2021)     |
| <i>F. pharetrum</i>            | FOSC    | CPC 30822  | <i>Aliodendron dichotomum</i> | South Africa     | MH485042      | MH484951    | MH484769    | MH485133    | Lombard et al. (2019)    |
| <i>F. phyllophilum</i>         | FFSC    | NRRL13617  | <i>Dracaena deremensis</i>    | Italy            | MN193864      | KF466410    | KF466333    | KF466443    | Laraba et al. (2020)     |
| <i>F. pilosicola</i>           | FFSC    | NRRL 29123 | <i>Bidens pilosa</i>          | USA              | MN534054      | MN534247    | MN534165    | MN534098    | Yilmaz et al. (2021)     |
| <i>F. pininemorale</i>         | FFSC    | CMW:25243  | <i>Pinus tecunumanii</i>      | Colombia         | MN534026      | MN534250    | MN534211    | MN534115    | Yilmaz et al. (2021)     |
| <i>F. proliferatum</i>         | FFSC    | CBS 480.96 | Tropical rain forest soil     | Papua New Guinea | MN534059      | MN534272    | MN534217    | MN534129    | Yilmaz et al. (2021)     |
| <i>F. pseudoanthophilum</i>    | FFSC    | CBS 745.97 | <i>Zea mays</i>               | Zimbabwe         | MW402148      | MW402820    | MW402476    | MW402349    | Yilmaz et al. (2021)     |
| <i>F. pseudocircinatum</i>     | FFSC    | NRRL22946  | <i>Solanum</i> sp.            | Ghana            | AF160271      | MN534277    | MN534190    | MN534069    | O' Donnell et al. (2000) |
| <i>F. pseudonygamai</i>        | FFSC    | CBS 416.97 | <i>Pennisetum typhoides</i>   | Nigeria          | MN534030      | MN534283    | MN534194    | MN534064    | Yilmaz et al. (2021)     |
| <i>F. ramigenum</i>            | FFSC    | NRRL25208  | <i>Ficus carica</i>           | USA              | KF466423      | KF466412    | MN534187    | MN534145    | Proctor et al. (2013)    |

| Species                      | Complex | Collection | Host                        | Origin       | <i>tef1-α</i> | <i>rpb2</i> | <i>calm</i> | <i>tub2</i> | Reference                    |
|------------------------------|---------|------------|-----------------------------|--------------|---------------|-------------|-------------|-------------|------------------------------|
| <i>F. sacchari</i>           | FFSC    | CBS 131370 | <i>Oryzae australiensis</i> | Australia    | MW402031      | MW402793    | MW402404    | MW402230    | Yilmaz et al. (2021)         |
| <i>F. secorum</i>            | FFSC    | NRRL 62593 | <i>Beta vulgaris</i>        | USA          | KJ189225      | –           | KJ189235    | –           | Yilmaz et al. (2021)         |
| <i>F. siculi</i>             | FFSC    | CPC 27188  | <i>Citrus sinensis</i>      | Italy        | LT746214      | LT746327    | LT746189    | LT746346    | Sandoval-Denis et al. (2018) |
| <i>F. sororula</i>           | FFSC    | CMW:25513  | <i>Pinus tecunumanii</i>    | Colombia     | MN534035      | MN534246    | MN534210    | MN534114    | Yilmaz et al. (2021)         |
| <i>F. sterilihyposum</i>     | FFSC    | NRRL 25623 | <i>Mangifera sp.</i>        | South Africa | MN193869      | MN193897    | AF158353    | AF160316    | Yilmaz et al. (2021)         |
| <i>F. subglutinans</i>       | FFSC    | CBS 215.76 | <i>Zea mays</i>             | Germany      | MN534061      | MN534241    | MN534171    | MN534109    | Yilmaz et al. (2021)         |
| <i>F. succisae</i>           | FFSC    | CBS 187.34 | <i>Zostera marina</i>       | UK           | MW402109      | MW402810    | MW402448    | MW402307    | Yilmaz et al. (2021)         |
| <i>F. sudanense</i>          | FFSC    | CBS 454.97 | <i>Striga hermonthica</i>   | Sudan        | MN534037      | MN534278    | MN534179    | MN534073    | Yilmaz et al. (2021)         |
| <i>F. tardichlamyosporum</i> | FOSC    | CBS 102028 | <i>Musa sapientum</i>       | Malaysia     | MH484988      | MH484897    | MH484715    | MH485079    | Lombard et al. (2019)        |
| <i>F. temperatum</i>         | FFSC    | CBS 135538 | Pulmonary infection (human) | Mexico       | MN534039      | MN534239    | MN534168    | MN534111    | Yilmaz et al. (2021)         |
| <i>F. terricola</i>          | FFSC    | CBS 483.94 | Soil                        | Australia    | MN534042      | LT996156    | MN534189    | MN534076    | Yilmaz et al. (2021)         |
| <i>F. thapsinum</i>          | FFSC    | CBS 539.79 | Man, white grained mycetoma | Italy        | MW402140      | MW402818    | MW402472    | MW402340    | Yilmaz et al. (2021)         |
| <i>F. tjaetaba</i>           | FFSC    | RBG5361    | <i>Sorghum interjectum</i>  | Australia    | KP083263      | KP083275    | LT996187    | GU737296    | Laurence et al. (2015)       |
| <i>F. triseptatum</i>        | FOSC    | CBS 258.50 | <i>Ipomoea batatas</i>      | USA          | MH484964      | MH484873    | MH484691    | MH485055    | Lombard et al. (2019)        |
| <i>F. tupiense</i>           | FFSC    | NRRL 53984 | <i>Mangifera indica</i>     | Brazil       | GU737404      | LR792619    | GU737377    | GU737350    | Yilmaz et al. (2021)         |
| <i>F. udum</i>               | FFSC    | NRRL22949  | Unknown                     | Unknown      | AF160275      | LT996172    | MW402442    | U34433      | O' Donnell et al. (2000)     |
| <i>F. verticillioides</i>    | FFSC    | CBS 116665 | <i>Solanum lycopersicum</i> | Unknown      | MW401976      | MW402825    | MW402375    | MW402176    | Yilmaz et al. (2021)         |
| <i>F. verticillioides</i>    | FFSC    | CBS 125.73 | <i>Trichosanthes dioica</i> | India        | MW402012      | MW402791    | MW402392    | MW402212    | Yilmaz et al. (2021)         |
| <i>F. verticillioides</i>    | FFSC    | CBS 167.87 | <i>Pinus</i> seed           | USA          | MW402101      | -           | MW402441    | MW402300    | Yilmaz et al. (2021)         |
| <i>F. verticillioides</i>    | FFSC    | CBS 447.95 | <i>Asparagus</i>            | Unknown      | MW402133      | MW402770    | MW402466    | MW402332    | Yilmaz et al. (2021)         |

| Species                   | Complex | Collection | Host                                     | Origin          | <i>tef1-α</i> | <i>rpb2</i> | <i>calm</i> | <i>tub2</i> | Reference             |
|---------------------------|---------|------------|------------------------------------------|-----------------|---------------|-------------|-------------|-------------|-----------------------|
| <i>F. verticillioides</i> | FFSC    | CBS 531.95 | <i>Zea mays</i>                          | Unknown         | MW402136      | MW402771    | MW402468    | MW402336    | Yilmaz et al. (2021)  |
| <i>F. verticillioides</i> | FFSC    | CBS 131389 | Environmental                            | Australia       | KU711695      | KU604226    | MN534193    | KU603857    | Yilmaz et al. (2021)  |
| <i>F. verticillioides</i> | FFSC    | CBS 734.97 | <i>Zea mays</i>                          | Germany         | MW402146      | EF470122    | AF158315    | MW402346    | Yilmaz et al. (2021)  |
| <i>F. verticillioides</i> | FFSC    | 8.2        | <i>Zea mays</i>                          | Italy           | OR565996      | OR566057    | OR566034    | OR566012    | This study            |
| <i>F. verticillioides</i> | FFSC    | 35.1.4     | <i>Zea mays</i>                          | Italy           | OR565997      | OR566058    | OR566035    | OR566013    | This study            |
| <i>F. verticillioides</i> | FFSC    | 56.1.2     | <i>Zea mays</i>                          | Italy           | OR565998      | OR566059    | OR566036    | OR566014    | This study            |
| <i>F. verticillioides</i> | FFSC    | 56.2.2     | <i>Zea mays</i>                          | Italy           | OR565999      | OR566060    | OR566037    | OR566015    | This study            |
| <i>F. verticillioides</i> | FFSC    | 56.2.3     | <i>Zea mays</i>                          | Italy           | OR566000      | OR566061    | OR566038    | OR566016    | This study            |
| <i>F. verticillioides</i> | FFSC    | 56.2.4     | <i>Zea mays</i>                          | Italy           | OR566001      | OR566062    | OR566039    | OR566017    | This study            |
| <i>F. verticillioides</i> | FFSC    | 56.2.5     | <i>Zea mays</i>                          | Italy           | OR566002      | OR566063    | OR566040    | OR566018    | This study            |
| <i>F. verticillioides</i> | FFSC    | 57.2.1     | <i>Zea mays</i>                          | Italy           | OR566003      | OR566064    | OR566041    | OR566019    | This study            |
| <i>F. veterinarianium</i> | FOSC    | CBS 109898 | <i>Shark peritoneum</i>                  | The Netherlands | MH484990      | MH484899    | MH484717    | MH485081    | Lombard et al. (2019) |
| <i>F. volatile</i>        | FFSC    | CBS 143874 | Human<br>bronchoalveolar<br>lavage fluid | French Guiana   | LR596007      | LR596006    | MK984595    | LR596008    | Yilmaz et al. (2021)  |
| <i>F. werrikimbe</i>      | FFSC    | CBS 125535 | <i>Sorghum leiocladum</i>                | Australia       | MW928846      | MN534304    | MN534203    | MN534104    | Yilmaz et al. (2021)  |
| <i>F. xylarioides</i>     | FFSC    | NRRL25486  | <i>Coffea</i> trunk                      | Ivory Coast     | MN193874      | HM068355    | MW402455    | AY707118    | Laraba et al. (2020)  |
| <i>F. xyrophilum</i>      | FFSC    | NRRL 62710 | <i>Xyris</i> spp.                        | Guyana          | MN193875      | MN193903    | –           | –           | Yilmaz et al. (2021)  |
